# Supplementary material for: Molecular profile of dissociative drug ketamine in relation to its rapid antidepressant action
Source: PubMed Central journal article supplement (PMC4869301; doi:10.1186/s12864-016-2713-3), 2016-05-17

## HIPPOCAMPUS

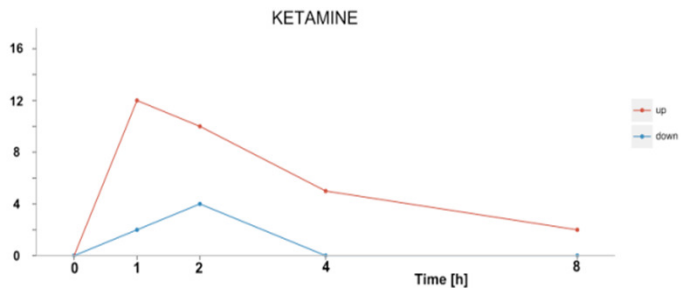

## STRIATUM

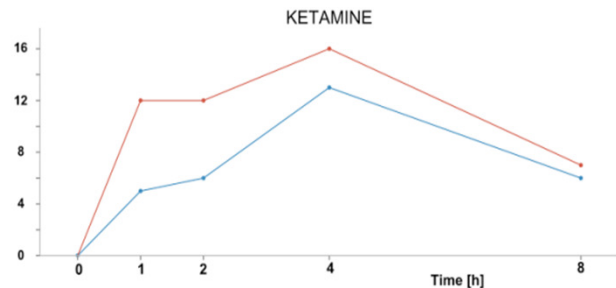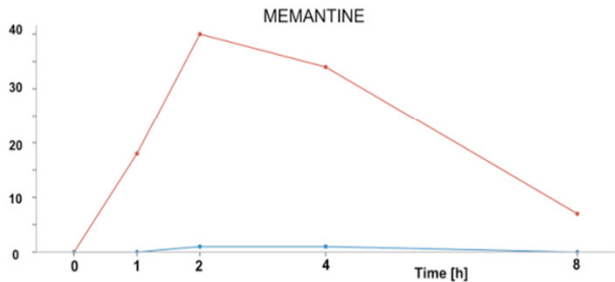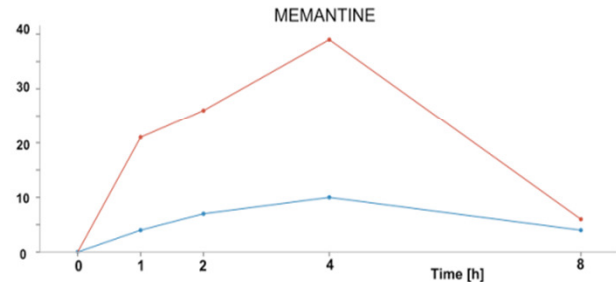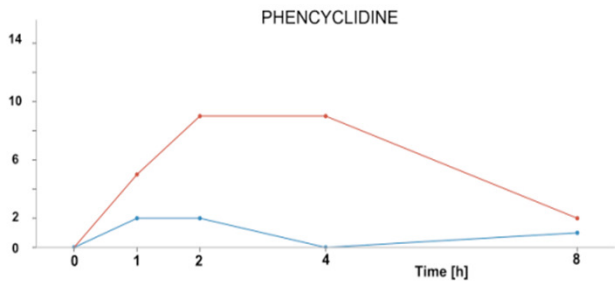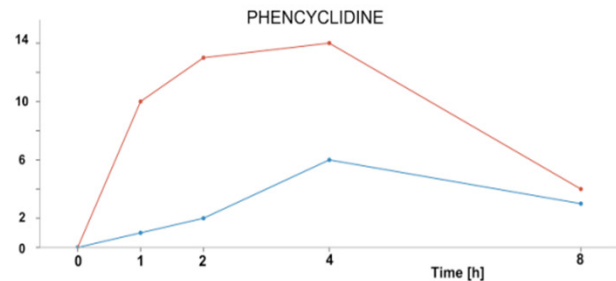

Supplement: 12864_2016_2713_MOESM5_ESM.pdf [file 12864_2016_2713_MOESM5_ESM.pdf]
